# Supplementary material for: Near-infrared light-activated ROS generation using semiconducting polymer nanocatalysts for photodynamic–chemodynamic therapy
Source: Royal Society of Chemistry journal article supplement (doi:10.1039/d3tb00642e), 2023-01-01
Supplement: d3tb00642e1.pdf [file d3tb00642e1.pdf]

## **Supplementary information**

### **Near-infrared light-activated ROS generation using semiconducting polymer nanocatalysts for photodynamic-chemodynamic therapy**

Yingyi Deng<sup>a</sup>, Mengbin Ding<sup>a</sup>, Liyun Zhu<sup>a</sup>, Yijing Zhang<sup>a</sup>, Fengshuo Wang<sup>a</sup>, Lingzhou Zhao<sup>\*b</sup>, Jingchao Li<sup>\*a</sup>

<sup>a</sup>State Key Laboratory for Modification of Chemical Fibers and Polymer Materials, Shanghai Engineering Research Center of Nano-Biomaterials and Regenerative Medicine, College of Biological Science and Medical Engineering, Donghua University, Shanghai 201620, China. Email: jcli@dhu.edu.cn.

<sup>b</sup> Department of Nuclear Medicine, Shanghai General Hospital, Shanghai Jiao Tong University School of Medicine, Shanghai 200080, China. Email: zlz-330@163.com.

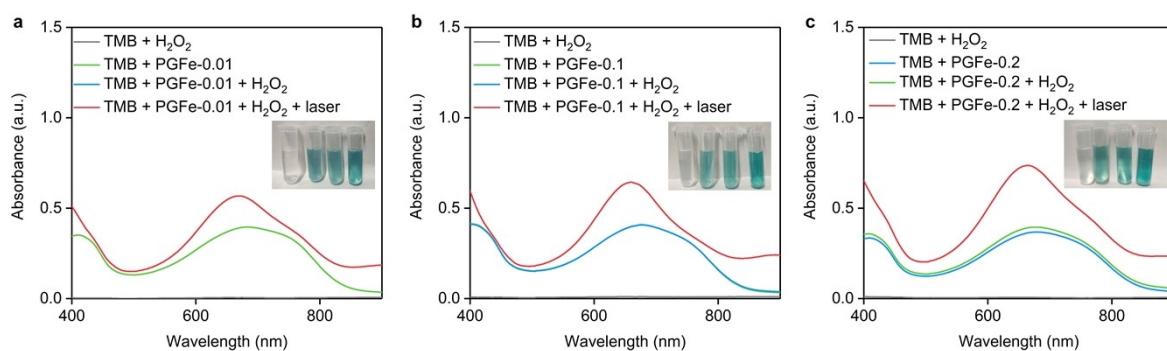

**Figure S1.** The  $\cdot\text{OH}$  generation evaluation for PGFe-0.01, PGFe-0.1 and PGFe-0.2 at different conditions using TMB as the indicator.

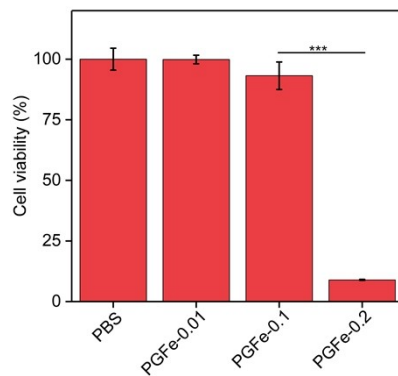

**Figure S2.** Cell viability of 4T1 cancer cells after incubation with PGFe-0.01, PGFe-0.1 and PGFe-0.2.

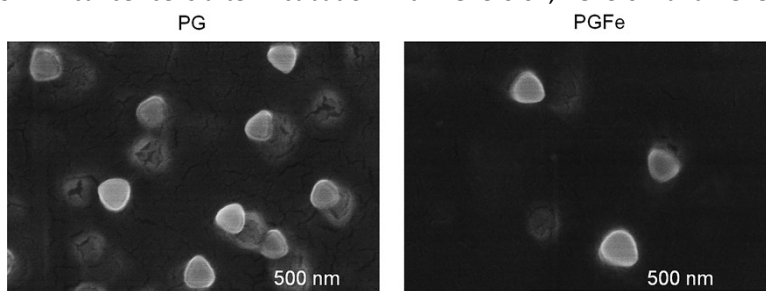

**Figure S3.** SEM iamges of PG and PGFe.

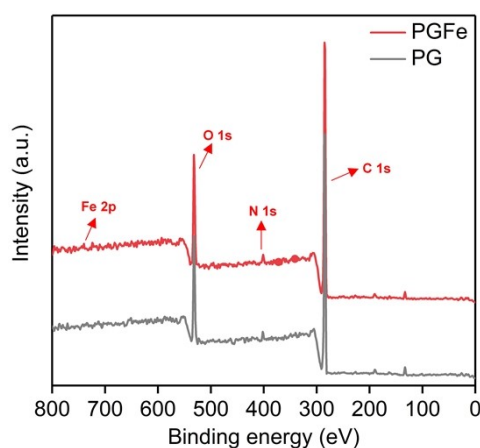

**Figure S4.** XPS spectra of PG and PGFe.

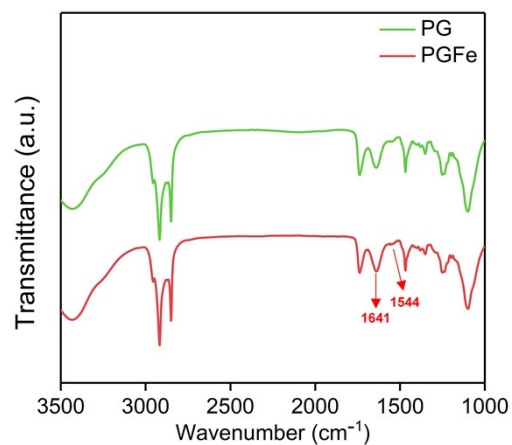

**Figure S5.** FTIR spectra of PG and PGFe.

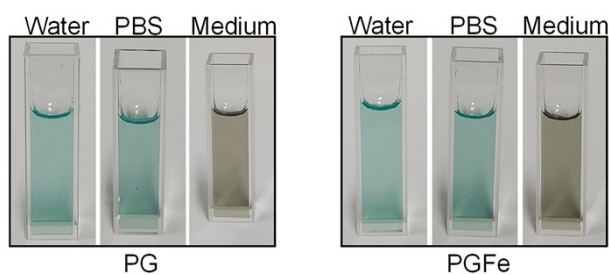

**Figure S6.** Photographs of PG and PGFe after storage in water, PBS and cell culture medium for two weeks.

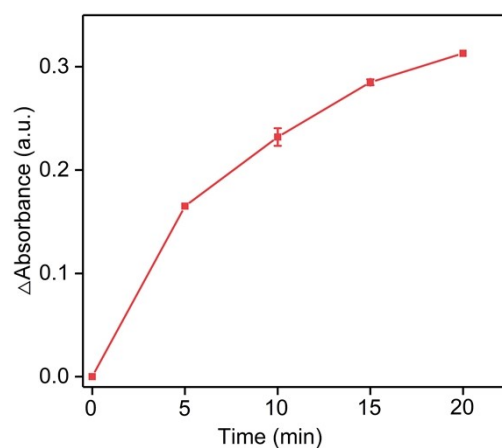

**Figure S7.** Absorbance changes for TMB solution containing PGFe and H<sub>2</sub>O<sub>2</sub> for different time.

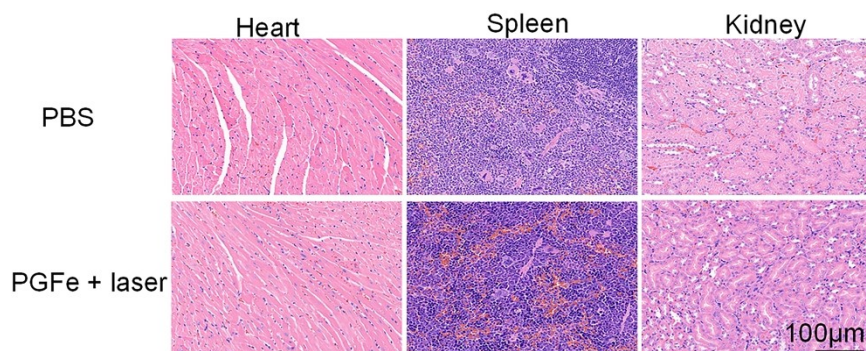

**Figure S8.** Histological H&E staining images of heart, kidney and spleen in PBS and PGFe + laser groups after treatments for 24 days.

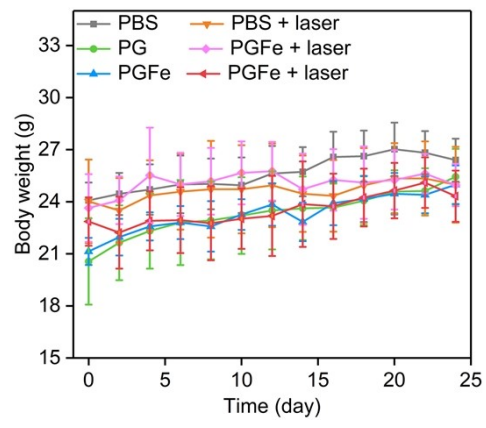

**Figure S9.** Body weights of 4T1 tumor-bearing mice after different treatments for 24 days.
